# Supplementary material for: Rockfall trajectory reconstruction: a flexible method utilizing video footage and high-resolution terrain models
Source: Copernicus journal article supplement (doi:10.5194/esurf-10-1141-2022), 2022-11-14
Supplement: Supplementary file 1 [file esurf-10-1141-2022-supplement.zip]

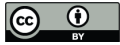

## *Supplement of*

# **Rockfall trajectory reconstruction: a flexible method utilizing video footage and high-resolution terrain models**

**François Noël et al.**

*Correspondence to:* François Noël ([francois.noel@ngu.no](mailto:francois.noel@ngu.no))

- [esurf-10-1141-2022-supplement-title-page.pdf](#)
- [reconstructed\\_trajectories\\_r1\\_r2](#)
  - [3d\\_trajectories\\_epsg2056\\_lv95](#)
    - \* [traj\\_bl802\\_r1.las](#)
    - \* [traj\\_bl804\\_r2.las](#)
    - \* [vect\\_impact\\_bl802\\_r1.las](#)
    - \* [vect\\_impact\\_bl804\\_r2.las](#)
  - [impacts\\_chant\\_sura\\_r1\\_r2\\_epsg2056\\_lv95.xlsx](#)

The copyright of individual parts of the supplement might differ from the article licence.
